# Supplementary material
Source: MDPI journal article supplement (https://www.mdpi.com/2311-5637/9/4/379)
Supplement: s1 [file s1]

## Supplementary Materials:

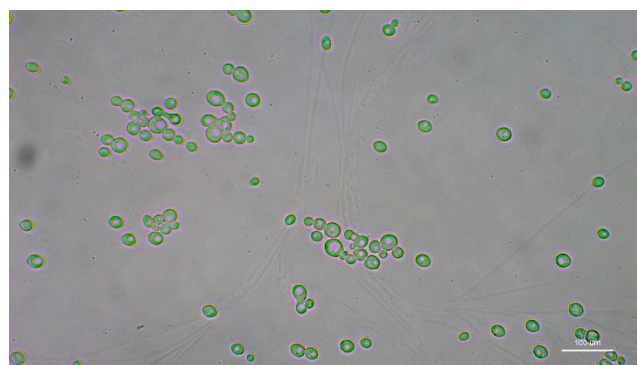

(A)

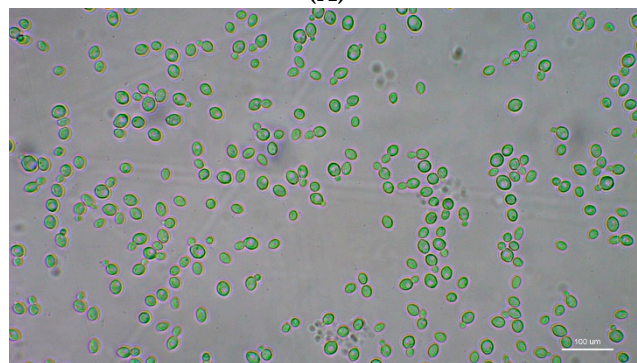

(B)

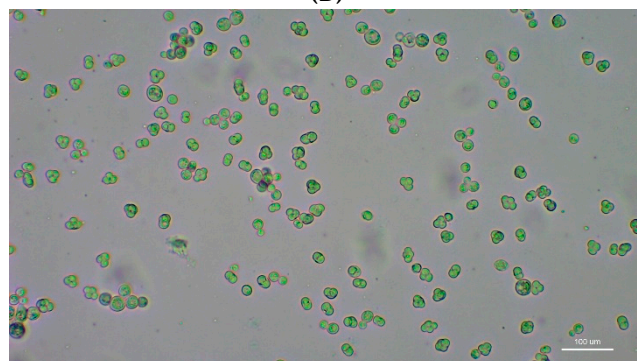

(C)

**Figure S1.** Hybridization acquisition and verification of recombinant diploid strain. (A) Hybrid morphology of recombinant haploid yeasts. (B) Diploid yeast morphology after hybridization. (C) Verification of sporulation of recombinant diploid yeast. (at  $\times 400$  magnification).

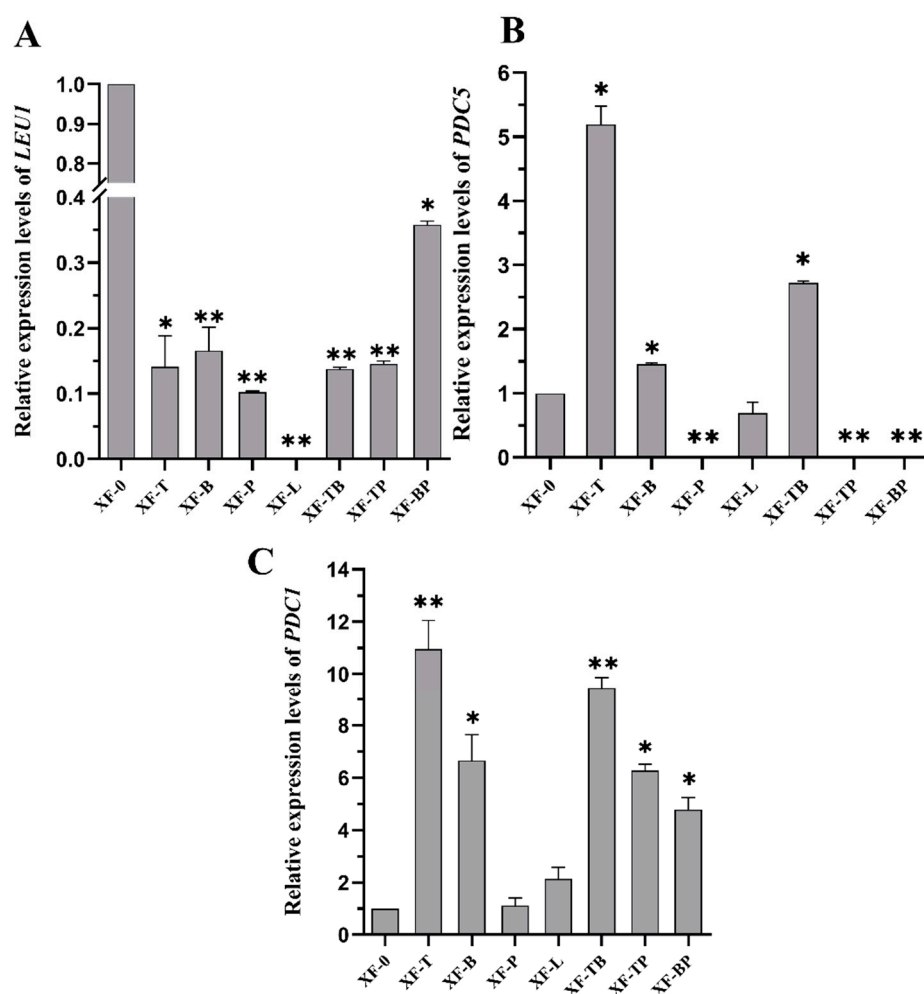

**Figure S2.** Relative expression level of *LEU1* (A), *PDC5* (B), and *PDC1* (C) in different recombinant strains. (\*  $p < 0.05$ , \*\*  $p < 0.01$ ).

**Table S1.** Strains and plasmids used in this study.

| Strains or plasmids | Relevant characteristics            | Reference or provider |
|---------------------|-------------------------------------|-----------------------|
| Strains             |                                     |                       |
| XF1                 | Diploid wild-type yeast strain      | This lab              |
| XF-B                | $\Delta BAT2::loxP$                 | This lab[24]          |
| XF-T                | $\Delta THI3::loxP$                 | This lab[23]          |
| XF-TB               | $\Delta THI3::\Delta BAT2::loxP$    | This lab[24]          |
| XFa7                | MATa, haploid yeast strain from XF1 | This lab              |

---

|                  |                                                                                   |            |
|------------------|-----------------------------------------------------------------------------------|------------|
| XF $\alpha$ 6    | MAT $\alpha$ , haploid yeast strain from XF1                                      | This lab   |
| XF $\alpha$ 7-T  | MAT $\alpha$ $\Delta$ THI3::loxP                                                  | This lab   |
| XF $\alpha$ 6-T  | MAT $\alpha$ $\Delta$ THI3::loxP                                                  | This lab   |
| XF $\alpha$ 7-B  | MAT $\alpha$ $\Delta$ BAT2::loxP                                                  | This lab   |
| XF $\alpha$ 6-B  | MAT $\alpha$ $\Delta$ BAT2::loxP                                                  | This lab   |
| XF $\alpha$ 7-P  | MAT $\alpha$ $\Delta$ PDPC5::loxP                                                 | This study |
| XF $\alpha$ 6-P  | MAT $\alpha$ $\Delta$ PDPC5::loxP                                                 | This study |
| XF $\alpha$ 7-L  | MAT $\alpha$ $\Delta$ LEU1::loxP                                                  | This study |
| XF $\alpha$ 6-L  | MAT $\alpha$ $\Delta$ LEU1::loxP                                                  | This study |
| XF $\alpha$ 7-BP | MAT $\alpha$ $\Delta$ BAT2:: $\Delta$ PDPC5::loxP                                 | This study |
| XF $\alpha$ 6-BP | MAT $\alpha$ $\Delta$ BAT2:: $\Delta$ PDPC5::loxP                                 | This study |
| XF $\alpha$ 7-TP | MAT $\alpha$ $\Delta$ THI3:: $\Delta$ PDPC5::loxP                                 | This study |
| XF $\alpha$ 6-TP | MAT $\alpha$ $\Delta$ THI3:: $\Delta$ PDPC5::loxP                                 | This study |
| XF-P             | $\Delta$ PDPC5::loxP                                                              | This study |
| XF-L             | $\Delta$ LEU1::loxP                                                               | This study |
| XF-BP            | $\Delta$ BAT2:: $\Delta$ PDPC5::loxP                                              | This study |
| XF-TP            | $\Delta$ THI3:: $\Delta$ PDPC5::loxP                                              | This study |
| Plasmids         |                                                                                   |            |
| PUG6             | Kanr, containing Amp <sup>+</sup> and loxP-kanMX-loxP<br>gene disruption cassette | This lab   |

---

|        |                                         |          |
|--------|-----------------------------------------|----------|
| PSH65  | Zeor, Cre recombinant enzyme expression | This lab |
| vector |                                         |          |

**Table S2.** List of the Primer sequences used in the current study.

| Primers                              | sequence (5'→3') <sup>a</sup>                      |
|--------------------------------------|----------------------------------------------------|
| For disruption cassette construction |                                                    |
| PDC5-F1                              | CTCCATATCCAAAGGTCGCG                               |
| PDC5-R1                              | TCGAGAATGGCAGCTCTTATATAC                           |
| PDC5-F2                              | TATGTTCTTGTAATTACTTTTCTG                           |
| PDC5-R2                              | GATCATAGCTAAAGGTAC                                 |
| P- <i>loxP</i> -F                    | <u>GTATATAAGAGCTGCCATTCTCGATT</u> CGTACGCTGCAGGTC  |
| P- <i>loxP</i> -R                    | <u>CAGAAAAGTAATTACAAGAACATAGC</u> GTTGGCCGATTCAT   |
| LEU1-F1                              | GCTACTAAGGCGTCATTACTC                              |
| LEU1-R1                              | TTGAGAAAATTCAGCGGAAAC                              |
| LEU1-F2                              | CTGGTATGGAAAGAGCCTTAG                              |
| LEU1-R2                              | GTAGAAGCACAACGTTTCATAG                             |
| L- <i>loxP</i> -F                    | <u>CGCTGTTTCCGCTGAATTTTCTCAATT</u> CGTACGCTGCAGGTC |
| L- <i>loxP</i> -R                    | <u>TAGGCTAAGGCTCTTTCCATACCAGG</u> CGTTGGCCGATTCAT  |
| For PCR verification                 |                                                    |
| PDC5-A                               | CGTAAATGCATACTACATGCG                              |
| PDC5-D                               | CACCACCCTCTTCAATTAGC                               |
| LEU1-A                               | AGTATTCGATGATTGAAGGCCGC                            |
| LEU1-D                               | GTAGAAGCACAACGTTTCATAG                             |

<sup>a</sup> Overlapping sequence for fusion PCR is underlined.
